# Supplementary material for: Arbuscular Mycorrhizal Fungi Improve the Performance of Tempranillo and Cabernet Sauvignon Facing Water Deficit under Current and Future Climatic Conditions
Source: MDPI journal article supplement (doi:10.3390/plants13081155), 2024-04-22
Supplement: s1 [file s1]

Table S1. Results of the three-way ANOVA applied to leaf photosynthesis (An), stomatal conductance (gs) and transpiration (E), intercellular CO<sub>2</sub> (Ci), pre-dawn leaf water potential ( $\psi_{pd}$ ), and concentration of proline and total soluble sugars (TSS) in Tempranillo and Cabernet Sauvignon subjected to drought on days 7 and 14 after the onset of water stress. The three main factors were ‘ambient (CATA or CETE, amb)’, ‘arbuscular mycorrhizal fungi, AMF’ and ‘water availability, water’. Table is showing the probability (*p*) values of each main factor and their interactions. Significant values are highlighted in bold.

|                                   | Day 7 after the onset of drought |                    |                    |                    |                    |                    |                    | Day 14 after the onset of drought |                    |                    |                    |                    |                    |              |
|-----------------------------------|----------------------------------|--------------------|--------------------|--------------------|--------------------|--------------------|--------------------|-----------------------------------|--------------------|--------------------|--------------------|--------------------|--------------------|--------------|
|                                   | An                               | gs                 | E                  | Ci                 | $\psi_{pd}$        | Proline            | AST                | An                                | gs                 | E                  | Ci                 | $\psi_{pd}$        | Proline            | AST          |
| <b>Tempranillo</b>                |                                  |                    |                    |                    |                    |                    |                    |                                   |                    |                    |                    |                    |                    |              |
| <i>Ambient (amb)</i>              | <b>&lt; 0.0001</b>               | <b>&lt; 0.0001</b> | <b>0.000</b>       | <b>&lt; 0.0001</b> | 0.127              | <b>&lt; 0.0001</b> | 0.193              | <b>&lt; 0.0001</b>                | 0.887              | <b>&lt; 0.0001</b> | <b>&lt; 0.0001</b> | 0.529              | <b>0.000</b>       | <b>0.036</b> |
| <i>AMF</i>                        | 0.400                            | <b>0.000</b>       | 0.143              | <b>0.003</b>       | 0.568              | <b>0.020</b>       | <b>&lt; 0.0001</b> | 0.120                             | <b>0.014</b>       | 0.686              | <b>0.017</b>       | 0.347              | <b>0.001</b>       | 0.902        |
| <i>Water availability (water)</i> | <b>0.024</b>                     | <b>0.003</b>       | <b>0.002</b>       | <b>0.000</b>       | <b>&lt; 0.0001</b> | 0.141              | 0.076              | <b>&lt; 0.0001</b>                | <b>&lt; 0.0001</b> | <b>&lt; 0.0001</b> | 0.067              | <b>&lt; 0.0001</b> | <b>&lt; 0.0001</b> | 0.181        |
| <i>Amb x AMF</i>                  | 0.119                            | <b>0.003</b>       | 0.289              | 0.052              | <b>0.000</b>       | <b>0.001</b>       | <b>&lt; 0.0001</b> | 0.887                             | 0.173              | 0.736              | 0.517              | 0.414              | 0.822              | 0.169        |
| <i>Amb x water</i>                | <b>0.003</b>                     | 0.622              | 0.058              | 0.067              | 0.662              | 0.339              | 0.059              | 0.879                             | 0.977              | <b>0.032</b>       | 0.091              | 0.059              | 0.244              | 0.565        |
| <i>AMF x water</i>                | 0.957                            | 0.370              | 0.303              | 0.365              | <b>0.007</b>       | <b>0.046</b>       | <b>0.050</b>       | 0.090                             | <b>0.004</b>       | <b>0.003</b>       | <b>0.009</b>       | 0.694              | <b>0.012</b>       | 0.206        |
| <i>Ambient x AMF x water</i>      | <b>0.000</b>                     | 0.328              | 0.127              | 0.632              | <b>0.000</b>       | 0.334              | 0.187              | <b>0.000</b>                      | <b>0.003</b>       | <b>0.023</b>       | 0.146              | 0.116              | <b>0.000</b>       | 0.443        |
| <b>Cabernet Sauvignon</b>         |                                  |                    |                    |                    |                    |                    |                    |                                   |                    |                    |                    |                    |                    |              |
| <i>Ambient (amb)</i>              | <b>&lt; 0.0001</b>               | 0.911              | 0.278              | <b>&lt; 0.0001</b> | 0.608              | 0.776              | 0.703              | <b>&lt; 0.0001</b>                | 0.835              | 0.421              | <b>&lt; 0.0001</b> | <b>0.040</b>       | <b>0.001</b>       | 0.182        |
| <i>AMF</i>                        | <b>0.002</b>                     | 0.047              | 0.491              | <b>0.002</b>       | 0.141              | <b>0.003</b>       | 0.378              | <b>0.001</b>                      | <b>&lt; 0.0001</b> | <b>&lt; 0.0001</b> | <b>&lt; 0.0001</b> | <b>0.020</b>       | <b>&lt; 0.0001</b> | 0.600        |
| <i>Water availability (water)</i> | 0.097                            | <b>&lt; 0.0001</b> | <b>&lt; 0.0001</b> | <b>&lt; 0.0001</b> | 0.167              | 0.956              | 0.339              | <b>0.000</b>                      | <b>&lt; 0.0001</b> | <b>&lt; 0.0001</b> | <b>&lt; 0.0001</b> | <b>0.002</b>       | 0.243              | 0.322        |
| <i>Amb x AMF</i>                  | 0.188                            | 0.088              | 0.584              | <b>0.001</b>       | 0.130              | <b>0.001</b>       | 0.490              | <b>0.001</b>                      | <b>0.024</b>       | 0.666              | <b>0.000</b>       | 0.285              | 0.364              | 0.883        |
| <i>Amb x water</i>                | 0.216                            | 0.947              | 0.427              | 0.908              | 0.615              | <b>0.000</b>       | 0.272              | <b>0.009</b>                      | 0.185              | 0.161              | <b>0.000</b>       | <b>0.003</b>       | 0.355              | <b>0.026</b> |
| <i>AMF x water</i>                | 0.746                            | 0.057              | 0.149              | 0.295              | <b>0.021</b>       | <b>&lt; 0.0001</b> | 0.160              | 0.496                             | 0.190              | 0.821              | <b>0.018</b>       | 0.339              | <b>0.011</b>       | 0.240        |
| <i>Ambient x AMF x water</i>      | 0.274                            | 0.104              | 0.269              | <b>0.008</b>       | 0.815              | 0.816              | 0.424              | 0.458                             | 0.251              | 0.676              | 0.186              | 0.203              | 0.976              | 0.850        |

Table S2. Results of the two-way ANOVA applied to instantaneous water use efficiency (*WUE*), ratio between intercellular (*Ci*) and ambient (*Ca*) CO<sub>2</sub>, plant hydraulic conductance (*Kh*) and leaf water content (*WC*) expressed as percentages of well-watered controls in Tempranillo and Cabernet Sauvignon subjected to drought on days 7 and 14 after the onset of water stress. The two main factors were 'arbuscular mycorrhizal fungi, AMF' and 'ambient (CATA or CETE, amb)'. Table is showing the probability (*p*) values of each main factor and their interaction. Significant values are highlighted in bold.

|                               | Day 7 after the onset of drought |               |               |                    | Day 14 after the onset of drought |                    |               |                   |
|-------------------------------|----------------------------------|---------------|---------------|--------------------|-----------------------------------|--------------------|---------------|-------------------|
|                               | <i>WUE</i>                       | <i>Ci/Ca</i>  | <i>Kh</i>     | Leaf<br><i>WC</i>  | <i>WUE</i>                        | <i>Ci/Ca</i>       | <i>Kh</i>     | Leaf<br><i>WC</i> |
| <b>Tempranillo</b>            |                                  |               |               |                    |                                   |                    |               |                   |
| <i>AMF</i>                    | <b>0.0016</b>                    | <b>0.0013</b> | <b>0.0079</b> | 0.0843             | <b>0.0002</b>                     | <b>&lt; 0.0001</b> | 0.0826        | <b>0.0079</b>     |
| <i>Ambient (amb)</i>          | 0.4115                           | 0.6891        | 0.1169        | 0.4169             | <b>0.0001</b>                     | <b>0.0120</b>      | 0.6197        | 0.1169            |
| <i>AMF × amb</i>              | <b>0.0441</b>                    | <b>0.0411</b> | 0.2664        | 0.8213             | <b>0.0300</b>                     | <b>0.0554</b>      | 0.946         | 0.2664            |
| <b>Cabernet<br/>Sauvignon</b> |                                  |               |               |                    |                                   |                    |               |                   |
| <i>AMF</i>                    | <b>0.0277</b>                    | 0.0967        | 0.3813        | <b>&lt; 0.0001</b> | <b>0.0129</b>                     | <b>0.0028</b>      | <b>0.0264</b> | <b>0.0043</b>     |
| <i>Ambient (amb)</i>          | <b>0.0201</b>                    | 0.7081        | <b>0.0314</b> | <b>0.0025</b>      | 0.1829                            | 0.0527             | 0.1544        | <b>0.0099</b>     |
| <i>AMF × amb</i>              | <b>0.0040</b>                    | <b>0.0436</b> | <b>0.0293</b> | 0.6207             | 0.5646                            | 0.5386             | <b>0.0298</b> | 0.6321            |
